# Supplementary material for: Underlying molecular mechanisms of DIO2 susceptibility in symptomatic osteoarthritis
Source: PubMed Central journal article supplement — Ann Rheum Dis. 2014 Apr 2;74(8):1571–9. doi: 10.1136/annrheumdis-2013-204739 (PMC4516000; doi:10.1136/annrheumdis-2013-204739), 2014-04-02
Supplement: annrheumdis-2013-204739-s2.pdf [file annrheumdis-2013-204739-s2.pdf]

## SUPPLEMENTAL INFORMATION

### Supplemental Figure Legends:

#### Figure S1.

**TF binding evidence at the rs225014 locus.** USCS browser hg19 screenshot. Darker bars indicate stronger evidence for binding. CTCF shows a black bar, while the other TFs show less strong evidence indicated as grey bars.

#### Figure S2.

**The rs225014 risk allele does not influence local CTCF binding.** Electromobility shift assays (EMSAs) using full-length CTCF (CTCF-FL) and a truncated protein, containing just the 11 Zinc Finger binding domain (CTCF-11ZF). We have used three different probes containing the rs225014 common allele (T, Fig. 1, lane 1-2), the minor allele (C, Fig. 1, lane 3-4) and a non-existent allele (G, Fig. 1, lane 5-6). The latter is in highest agreement with the consensus CTCF-binding sequence. As a positive control, a known CTCF site 90 base pairs upstream of rs225014 was used (ENCODE project[1]) (DIO2-CTCF2; **Fig. 1**, lane 7-8). Lanes 1, 3, 5 and 7 depict the truncated CTCF protein, containing just the CTCF DNA binding domain whereas lanes 2, 4, 6 and 8 depict the full length CTCF protein. For lane 1 to 6 no band shifts were observed, indicating that CTCF does not bind the putative CTCF binding site located at the rs225014 SNP. However, we were able to confirm the putative CTCF binding site upstream of rs225014, as for both proteins a band shift was observed (lane 7-8).

#### Figure S3.

***DIO2* overexpression in hBMSCs, proven by co-transduced eGFP expression.** (A) GFP expression seen in cells cultured on culture dishes (B) Normal light microscopy picture of a hBMSC pellet after 3 weeks of culturing. (C) Fluorescence picture of a non-transduced hBMSC pellet after 3 weeks of culturing. (D) Fluorescence picture of an hBMSC pellet transduced with the control vector containing only the sequence for eGFP after 3 weeks of culturing. (E) Fluorescence picture of a hBMSC pellet transduced with the *DIO2* overexpressing vector containing both the sequence for eGFP and *DIO2*. (B, C, D, and E) Scale bar, 200  $\mu\text{m}$ .

**Figure S4.**

**The effect of excess T3 and IOP in a human BMSC in vitro chondrogenesis model.** (A-G) Alcian Blue staining of sections comparing control (top), thyroid treated (middle) and IOP treated (bottom) chondrogenic hBMSC pellets of (A-B) donor 54, (C-D) donor 55, (E-F) donor 56, and (G-H) donor 57. (A, C, E, and G) Scale bar, 400  $\mu\text{m}$ . (B, D, F, and H) Scale bar, 100  $\mu\text{m}$ .

**Figure S5.**

**Calculating the relative pixel intensity; an automated histology quantification method.** (A) Original image algorithm. (B) IsoData thresholding without rolling ball algorithm. (C) IsoData thresholding after rolling ball algorithm. (D) masking-area after separation (E) Glycosaminoglycan histology separated from the background (A-E) Scale bar, 400  $\mu\text{m}$ .

Supplemental Figures:

Figure S1.

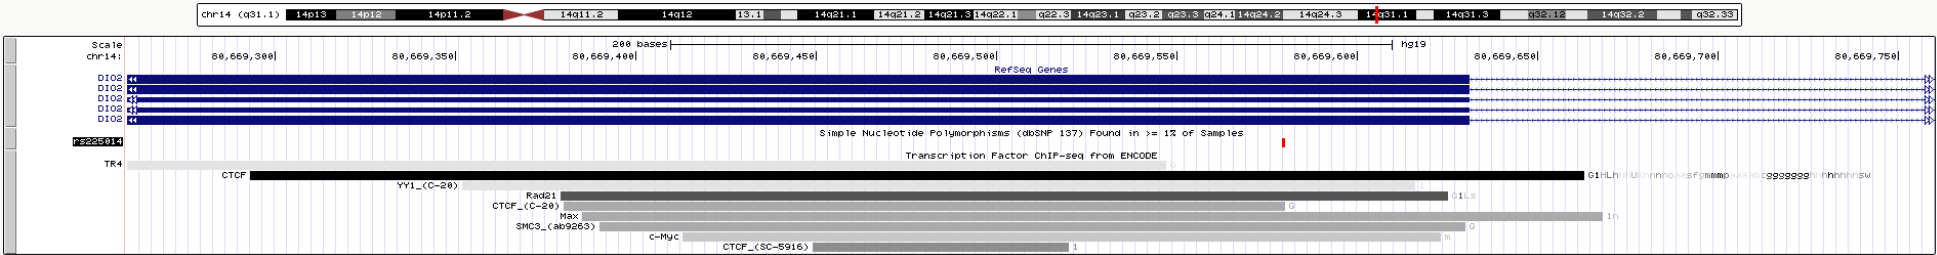

**Figure S2**

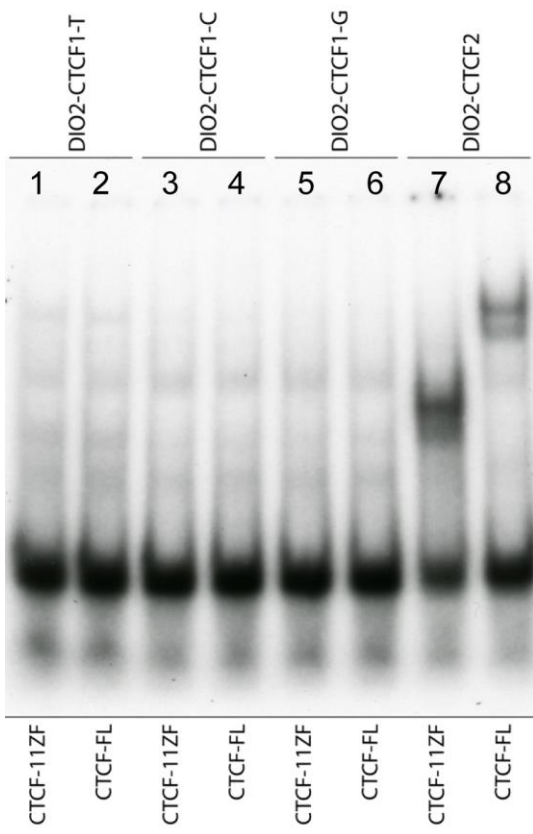

Figure S3.

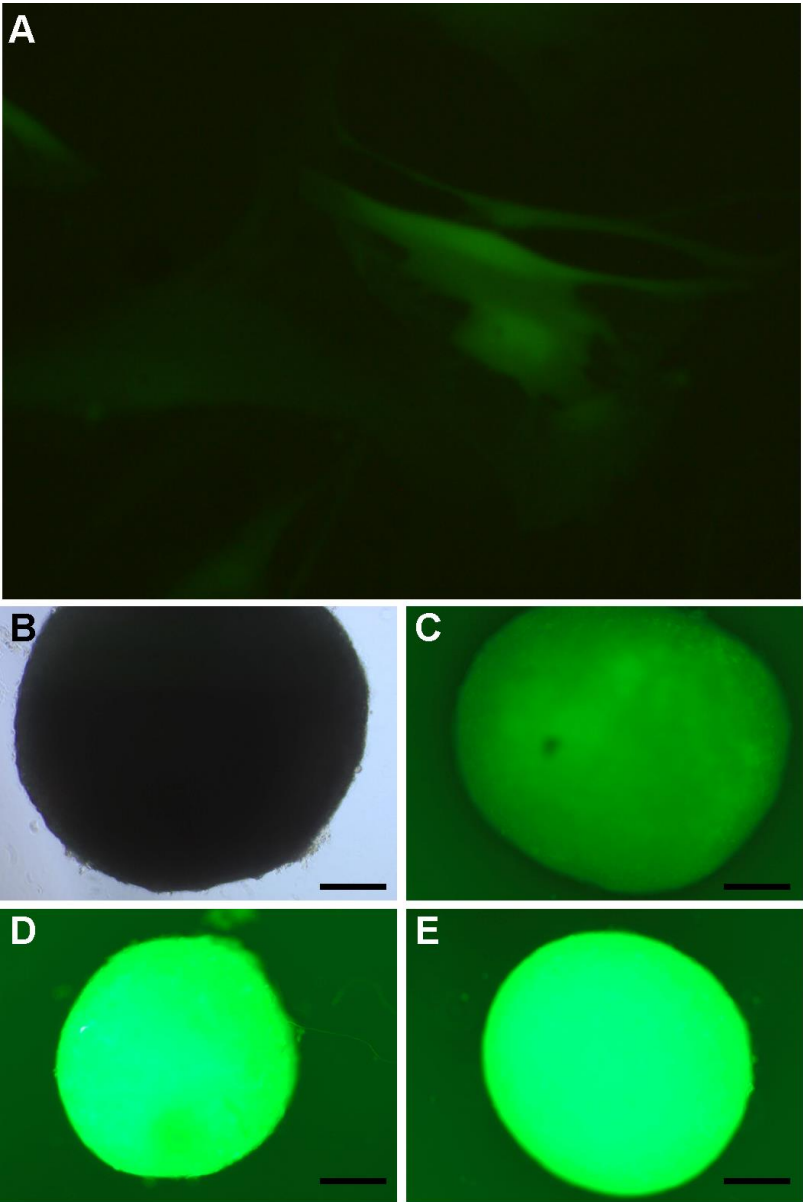

**Figure S4.**

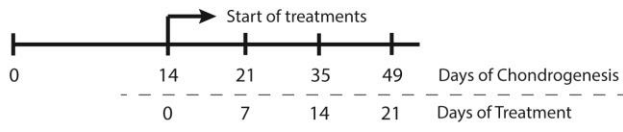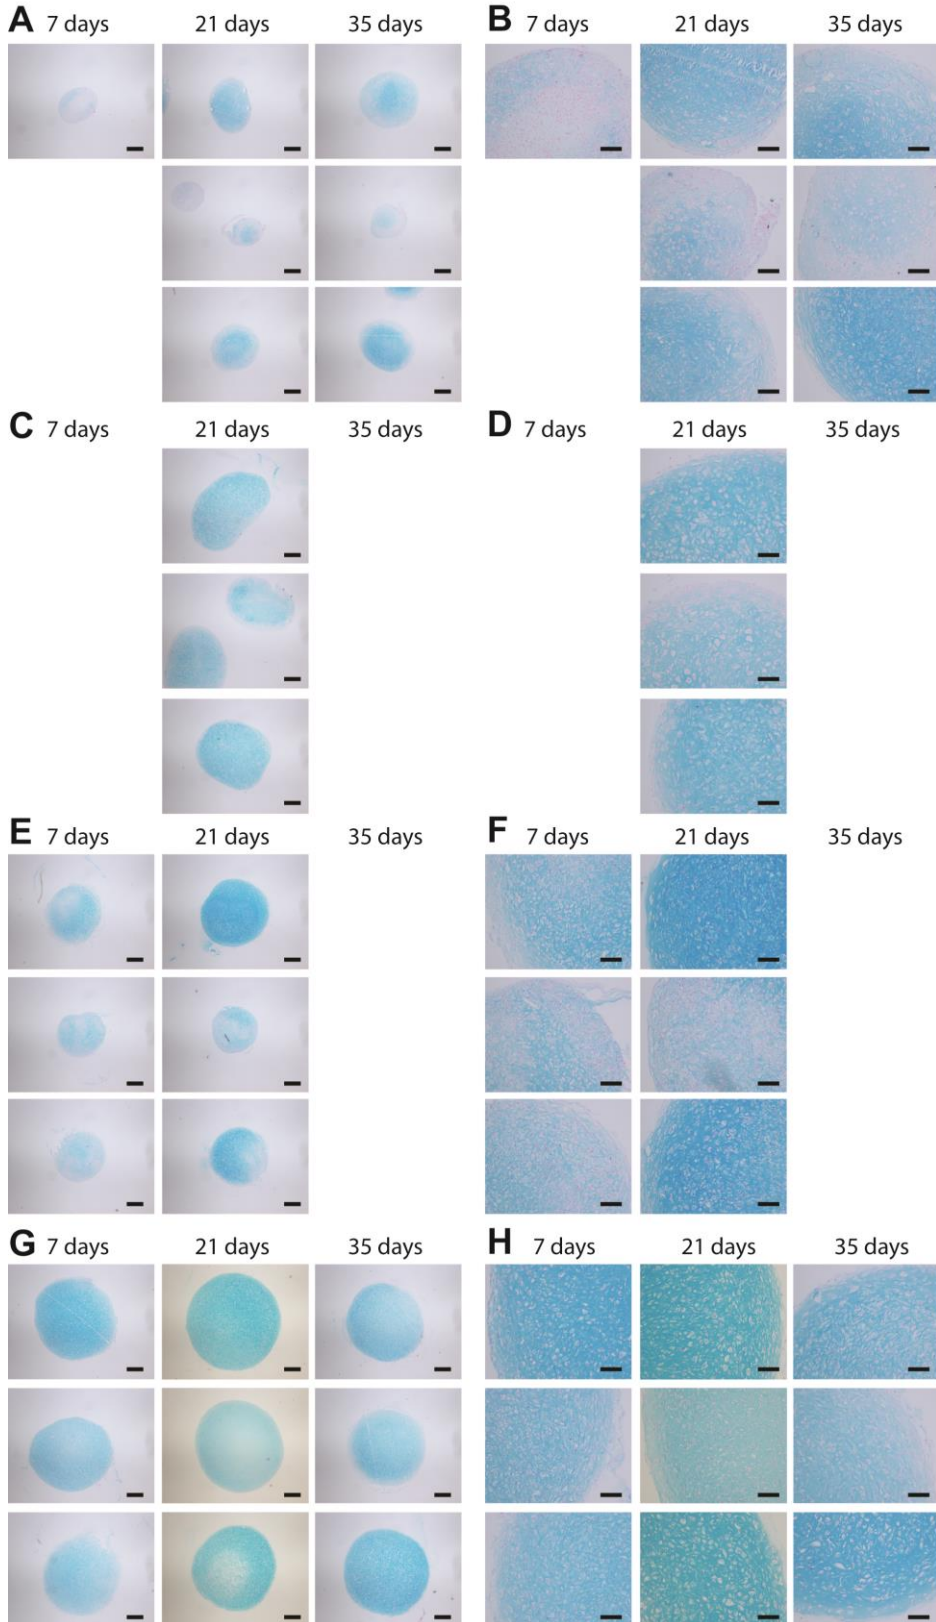

Figure S5.

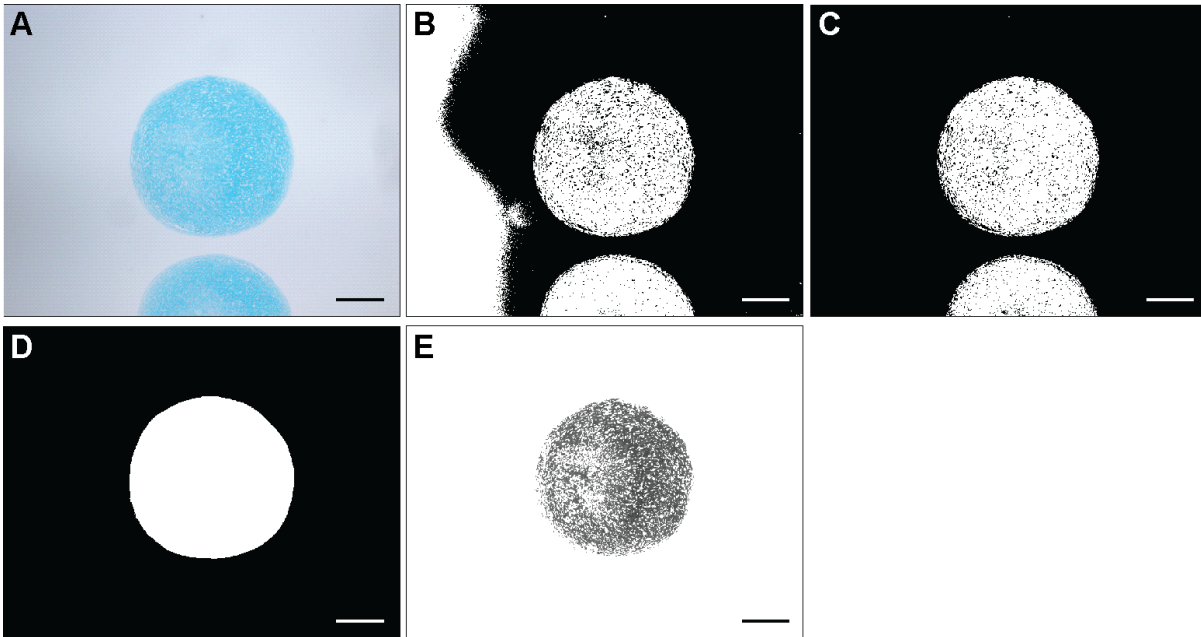

## Supplementary Table Legends:

### Table S1.

**Characteristics of samples used in methylation and expression assessment.** (<sup>a</sup>) Genotype for the rs225014 SNP

### Table S2

**Overview of quantified CpG dinucleotides across the *DIO2* locus, as depicted in Figure 2.** (<sup>a</sup>)

Location of the respective CpG dinucleotides in relation to the *DIO2* TSS. (<sup>b</sup>) Difference in methylation between preserved and matched OA affected samples. (<sup>c</sup>) Crude *P*-value of differential methylation. (<sup>d</sup>) Bonferroni adjusted *P*-value of differential methylation. (<sup>e</sup>) Number of samples used in the analyses for quantification of methylation (<sup>f</sup>)  $\beta$ -estimate of the methylation variable in the regression analysis with *DIO2* expression as outcome. (<sup>g</sup>) Crude *P*-value of the methylation variable in the regression analysis. (<sup>h</sup>) Bonferroni adjusted *P*-value of the methylation variable in the regression analysis. (<sup>i</sup>) Number of samples used in the regression analysis.

### Table S3

**Multivariate analysis the individual effects.** Effects of CpG -2031 methylation, joint site (hip or knee) and rs225014 alleles on *DIO2* expression in articular cartilage

### Table S4

**Characteristics of hBMSC donors of the RAAK study.** (<sup>a</sup>) Genotype for the rs225014 SNP.

### Table S5



**Used EMSA probes.** The CTCF consensus motif is underlined and the nucleotide changes between the probes are indicated in bold.

**Table S6**

**Sequenom amplicons primer sequences.**

**Table S7**

**ChIP primer sequences.**

**Table S8**

**Real time quantitative PCR primers.**

## Supplemental Tables:

Table S1

| Donor | Gender | Age | Joint | rs225014 <sup>a</sup> |
|-------|--------|-----|-------|-----------------------|
| 1     | Female | 78  | Hip   | TC                    |
| 2     | Female | 79  | Hip   | TT                    |
| 3     | Male   | 67  | Hip   | TT                    |
| 4     | Male   | 69  | Knee  | TC                    |
| 5     | Female | 77  | Hip   | TC                    |
| 6     | Female | 74  | Hip   | TT                    |
| 7     | Male   | 72  | Hip   | TC                    |
| 8     | Female | 75  | Hip   | TT                    |
| 9     | Male   | 54  | Knee  | TT                    |
| 10    | Male   | 64  | Knee  | TC                    |
| 11    | Female | 65  | Knee  | TT                    |
| 12    | Female | 68  | Hip   | TT                    |
| 13    | Male   | 61  | Hip   | TC                    |
| 14    | Female | 75  | Hip   | TT                    |
| 15    | Male   | 61  | Knee  | TT                    |
| 16    | Female | 80  | Hip   | TT                    |
| 17    | Female | 78  | Knee  | TT                    |
| 18    | Male   | 44  | Hip   | TC                    |
| 19    | Female | 79  | Hip   | TC                    |
| 20    | NA     | NA  | Knee  | CC                    |
| 21    | NA     | NA  | Hip   | TC                    |
| 22    | NA     | NA  | Hip   | TC                    |
| 23    | Male   | 63  | Hip   | TC                    |
| 24    | Female | 69  | Hip   | TC                    |
| 25    | Female | 46  | Knee  | TT                    |
| 26    | Female | 68  | Knee  | TT                    |
| 27    | NA     | 69  | Knee  | TT                    |
| 28    | Male   | 64  | Hip   | TC                    |
| 29    | Female | 58  | Knee  | TC                    |
| 30    | Female | 57  | Knee  | TC                    |
| 31    | Female | 62  | Hip   | TC                    |
| 32    | Female | 67  | Knee  | TC                    |
| 33    | Male   | 68  | Hip   | TC                    |
| 34    | Male   | 67  | Hip   | TC                    |

|    |        |    |      |    |
|----|--------|----|------|----|
| 35 | Female | 53 | Hip  | TT |
| 36 | Male   | 82 | Knee | TT |
| 37 | Female | 70 | Knee | TC |
| 38 | NA     | NA | Knee | TT |
| 39 | Female | 60 | Knee | TT |
| 40 | NA     | NA | Knee | TC |
| 41 | Male   | 69 | Knee | TT |
| 42 | Male   | 77 | Hip  | TC |
| 43 | Female | 66 | Knee | TT |
| 44 | NA     | NA | Knee | TC |
| 45 | Female | 80 | Knee | CC |
| 46 | Female | 80 | Knee | TT |
| 47 | NA     | NA | Knee | CC |
| 48 | NA     | NA | Knee | TC |
| 49 | Male   | 69 | Knee | TT |
| 50 | Male   | NA | Knee | TC |
| 51 | Female | 62 | Knee | TC |
| 52 | Male   | NA | Knee | TC |

---

**Table S2**

| Location <sup>a</sup> | Differential methylation |         |                               |                              |                                       |                | Correlation between methylation and |                              |                                       |                |
|-----------------------|--------------------------|---------|-------------------------------|------------------------------|---------------------------------------|----------------|-------------------------------------|------------------------------|---------------------------------------|----------------|
|                       | Mean Preserved           | Mean OA | Preserved versus OA cartilage |                              |                                       |                | <i>DIO2</i> expression              |                              |                                       |                |
|                       |                          |         | Beta <sup>b</sup>             | <i>P</i> -value <sup>c</sup> | Adjusted <i>P</i> -value <sup>d</sup> | N <sup>e</sup> | Beta <sup>f</sup>                   | <i>P</i> -value <sup>g</sup> | Adjusted <i>P</i> -value <sup>h</sup> | N <sup>i</sup> |
| CpG +15180            | 0.377                    | 0.391   | 0.015                         | 0.12293                      | 1                                     | 102            | -0.581                              | 0.57794                      | 1                                     | 85             |
| CpG +15148            | 0.897                    | 0.902   | 0.005                         | 0.42454                      | 1                                     | 103            | -1.960                              | 0.23275                      | 1                                     | 86             |
| CpG +15015            | 0.846                    | 0.842   | -0.004                        | 0.39223                      | 1                                     | 103            | -3.284                              | 0.10764                      | 1                                     | 86             |
| CpG +8802             | 0.678                    | 0.681   | 0.001                         | 0.92605                      | 1                                     | 76             | -2.745                              | 0.04668                      | 1                                     | 64             |
| CpG +8771             | 0.852                    | 0.846   | -0.007                        | 0.03448                      | 0.793                                 | 98             | -0.303                              | 0.90671                      | 1                                     | 82             |
| CpG +8758             | 0.906                    | 0.903   | -0.003                        | 0.36266                      | 1                                     | 101            | -1.245                              | 0.69968                      | 1                                     | 84             |
| CpG +8742             | 0.944                    | 0.942   | -0.002                        | 0.42346                      | 1                                     | 99             | -0.126                              | 0.97346                      | 1                                     | 82             |
| CpG +8731             | 0.972                    | 0.974   | 0.001                         | 0.58860                      | 1                                     | 103            | -8.680                              | 0.12942                      | 1                                     | 86             |
| CpG +8635             | 0.716                    | 0.724   | 0.009                         | 0.12923                      | 1                                     | 102            | 0.422                               | 0.80058                      | 1                                     | 85             |
| CpG +8547             | 0.872                    | 0.866   | -0.005                        | 0.13632                      | 1                                     | 97             | 2.832                               | 0.35395                      | 1                                     | 80             |
| CpG +8527             | 0.758                    | 0.779   | 0.017                         | 0.01689                      | 0.389                                 | 100            | -0.904                              | 0.49324                      | 1                                     | 83             |
| CpG +8481             | 0.167                    | 0.182   | 0.015                         | 0.00913                      | 0.210                                 | 103            | -0.201                              | 0.91184                      | 1                                     | 86             |
| CpG -219              | 0.011                    | 0.012   | 0.000                         | 0.92106                      | 1                                     | 94             | 7.420                               | 0.19666                      | 1                                     | 79             |
| CpG -322              | 0.024                    | 0.026   | 0.002                         | 0.60637                      | 1                                     | 98             | -2.373                              | 0.59233                      | 1                                     | 83             |
| CpG -473              | 0.015                    | 0.016   | 0.001                         | 0.15828                      | 1                                     | 102            | -7.684                              | 0.64305                      | 1                                     | 85             |
| CpG -571              | 0.031                    | 0.032   | 0.002                         | 0.28463                      | 1                                     | 97             | 2.355                               | 0.77655                      | 1                                     | 80             |
| CpG -642              | 0.013                    | 0.015   | 0.003                         | 0.08636                      | 1                                     | 98             | 5.473                               | 0.41953                      | 1                                     | 81             |
| CpG -1754             | 0.874                    | 0.908   | 0.032                         | 0.00449                      | 0.103                                 | 63             | 1.089                               | 0.42829                      | 1                                     | 54             |
| CpG -1761             | 0.947                    | 0.935   | -0.012                        | 0.00011                      | 0.002 **                              | 98             | -2.094                              | 0.48780                      | 1                                     | 82             |
| CpG -1838             | 0.763                    | 0.732   | -0.031                        | 0.00129                      | 0.030 *                               | 102            | -2.468                              | 0.01598                      | 0.368                                 | 86             |
| CpG -1942             | 0.940                    | 0.934   | -0.006                        | 0.02555                      | 0.588                                 | 103            | -1.530                              | 0.67832                      | 1                                     | 86             |
| CpG -2009             | 0.950                    | 0.942   | -0.008                        | 0.01004                      | 0.231                                 | 103            | -2.142                              | 0.54294                      | 1                                     | 86             |
| CpG -2031             | 0.153                    | 0.182   | 0.028                         | 0.00005                      | 0.001 **                              | 103            | 4.959                               | 0.00010                      | 0.002 **                              | 87             |

**Table S3**

|           | Beta   | Standard Error | Statistic | <i>P</i> -value |
|-----------|--------|----------------|-----------|-----------------|
| Intercept | -0.905 | 0.808          | -1.120    | 0.262           |
| CpG -2031 | 4.008  | 1.708          | 2.347     | 0.019           |
| Joint     | -0.247 | 0.168          | -1.471    | 0.141           |
| rs225014  | 0.557  | 0.154          | 3.629     | 0.0003          |
| Gender    | 0.202  | 0.146          | 1.385     | 0.166           |
| BMI       | -0.017 | 0.013          | -1.260    | 0.208           |
| Age       | -0.007 | 0.007          | -0.987    | 0.323           |

**Table S4**

| Donor | Sex    | Age | rs225014 <sup>a</sup> |
|-------|--------|-----|-----------------------|
| 53    | female | 66  | TC                    |
| 54    | female | 72  | TT                    |
| 55    | female | 81  | CC                    |
| 56    | female | 59  | TC                    |
| 57    | male   | 80  | TC                    |

**Table S5**

| Probe/Primer        | Sequence                                                             |
|---------------------|----------------------------------------------------------------------|
| EMSA DIO2-CTCF1-T F | TGGGTACCATTGCCACT <u>GTTGTCACCTCCTTCTGT</u> ACTGGAGACATGCACCACACT    |
| EMSA DIO2-CTCF1-T R | AGTGTGGTGCATGTCTCCAGT <u>ACAGAAGGAGGTGACAACAGTGGCAATGGTACCCA</u>     |
| EMSA DIO2-CTCF1-C F | TGGGTACCATTGCCACT <u>GTTGTCACCTCCTTCTGCACTGGAGACATGCACCACACT</u>     |
| EMSA DIO2-CTCF1-C R | AGTGTGGTGCATGTCTCCAGT <u>GCAGAAGGAGGTGACAACAGTGGCAATGGTACCCA</u>     |
| EMSA DIO2-CTCF1-G F | TGGGTACCATTGCCACT <u>GTTGTCACCTCCTTCTGGACTGGAGACATGCACCACACT</u>     |
| EMSA DIO2-CTCF1-G R | AGTGTGGTGCATGTCTCCAGT <u>CCAGAAGGAGGTGACAACAGTGGCAATGGTACCCA</u>     |
| EMSA DIO2-CTCF2 F   | GTCAAGTGGCTGAGCCAAAGT <u>TTGACCACTAGTGGGCGCTCAGGGCTGGCAAAGTCAAGA</u> |
| EMSA DIO2-CTCF2 R   | TCTTGACTTTGCCAGCCCT <u>GAGCGCCCACTAGTGGTCAACTTTGGCTCAGCCACTTGAC</u>  |

**Table S6**

| Probe/Primer | Sequence (5'-3')               |
|--------------|--------------------------------|
| Amplicon 1 F | GAAAGTTTTTTTGTGTGTGTAGAA       |
| Amplicon 1 R | CTCCCTTCTTAAATAAATTATTACCATTAT |
| Amplicon 2 F | GAAAGTTTTTTTGTGTGTGTAGAA       |
| Amplicon 2 R | AAAACATCACTTCATACCATAATTTAAATA |
| Amplicon 3 F | GATTAGGTTATGAGGGTTTTTTTTT      |
| Amplicon 3 R | AACAATAAAAATTTATTTAATTCACATTC  |
| Amplicon 4 F | TTAAGTAGTAGGTGTAAGTTTGTGGTTAG  |
| Amplicon 4 R | ACCCTATTCATTCATTCATTCAAAC      |
| Amplicon 5 F | TTTTTATGTGGTTAAAATTTTTATGATTAT |
| Amplicon 5 R | ACCCTATTCATTCATTCATTCAAAC      |
| Amplicon 6 F | TAAAGTTTGGGAAGTATTTTTTTGAAG    |
| Amplicon 6 R | TTCTTCTTAAATTACCAAATTTTT       |
| Amplicon 7 F | GTTTGTGGTGTAAGTGTTTTTTTTT      |
| Amplicon 7 R | TTTTACTTTTCTATTCACTACAATCCTAAC |
| Amplicon 8 F | ATAGATAGATAGTAAGAAGGGAAAGATAGA |
| Amplicon 8 R | AATCCAATTACCTCTATCAAATCC       |
| Amplicon 9 F | GTTGTAGGAGAAGGGGTTTTTTTTT      |
| Amplicon 9 R | CACCTTCTTAACTTTACCAACCCTA      |





**Table S8**

|         |         |                                |
|---------|---------|--------------------------------|
| GAPDH   | Forward | 5'-TGCCATGTAGACCCCTTGAAG-3'    |
|         | Reverse | 5'-ATGGTACATGACAAGGTGCGG-3'    |
| ACAN    | Forward | 5'-AGAGACTCACACAGTCGAAACAGC-3' |
|         | Reverse | 5'-CTATGTTACAGTGCTCGCCAGTG-3'  |
| COL2A1  | Forward | 5'-CTACCCCAATCCAGCAAACGT-3'    |
|         | Reverse | 5'-AGGTGATGTTCTGGGAGCCTT-3'    |
| COL10A1 | Forward | 5'-GGCAACAGCATTATGACCCA-3'     |
|         | Reverse | 5'-TGAGATCGATGATGGCACTCC-3'    |
| ADAMTS5 | Forward | 5'-GTGGTGAAGGTGGTGGTGCT-3'     |
|         | Reverse | 5'-CTCATGGTCATCTCCCAGCTG-3'    |
| MMP13   | Forward | 5'-TTGAGCTGGACTCATTGTGC-3'     |
|         | Reverse | 5'-GGAGCCTCTCAGTCATGGAG-3'     |
| ALPL    | Forward | 5'-CAAAGGCTTCTTCTTGCTGGTG-3'   |
|         | Reverse | 5'-CCTGCTTGGCTTTTCCTTCA-3'     |
| RUNX2   | Forward | 5'-CTGTGGTACTGTTCATGGCG-3'     |
|         | Reverse | 5'-AGGTAGCTACTTGGGGAGGA-3'     |
| EPAS1   | Forward | 5'-ACAGGTGGAGCTAACAGGAC-3'     |
|         | Reverse | 5'-CCGTGCACTTCATCCTCATG-3'     |
| DIO2    | Forward | 5'-TTCCAGTGTGGTGCATGTCTC-3'    |
|         | Reverse | 5'-AGTCAAGAAGGTGGCATGTGG-3'    |
| COL1A1  | Forward | 5'-GTGCTAAAGGTGCCAATGGT-3'     |
|         | Reverse | 5'-ACCAGGTTACCCGCTGTTAC-3'     |

**References**

## Reference List

- 1 Euskirchen GM, Rozowsky JS, Wei CL, Lee WH, Zhang ZD, Hartman S, *et al.*  
Mapping of transcription factor binding regions in mammalian cells by ChIP:  
comparison of array- and sequencing-based technologies. *Genome Res* 2007;17:898-909.
